# Supplementary material
Source: PubMed Central journal article supplement (PMC3250067)
Supplement: NIHMS325590-supplement-1.pdf [file NIHMS325590-supplement-1.pdf]

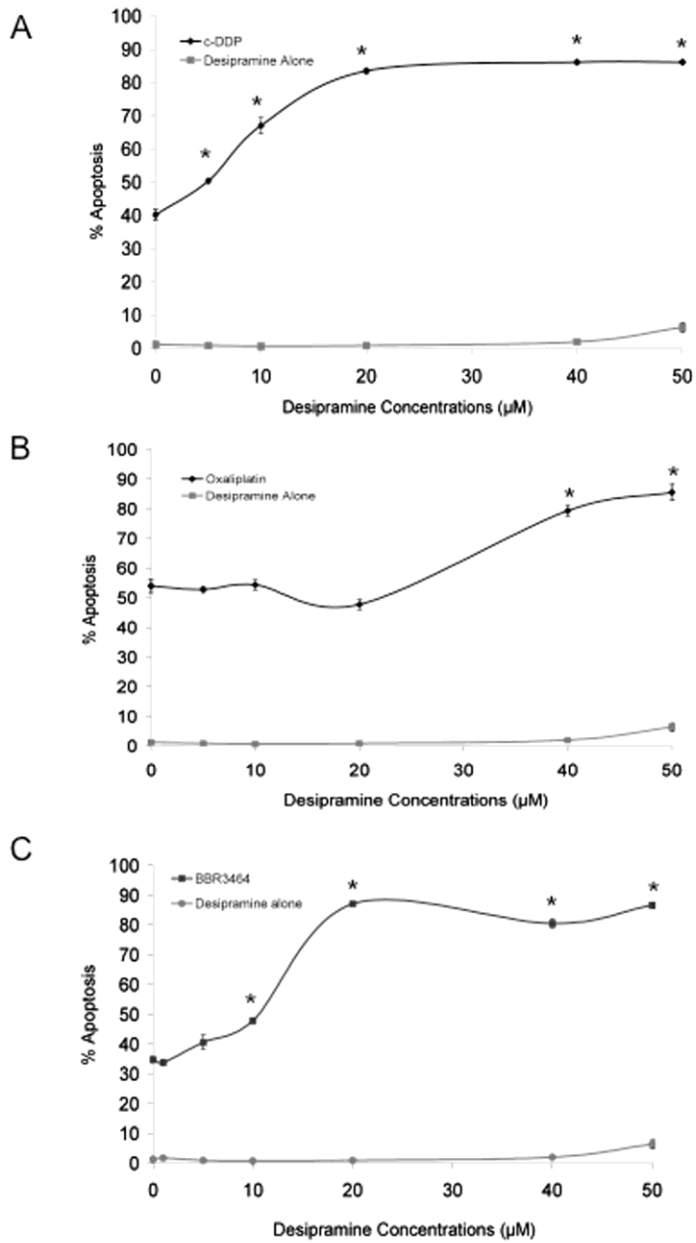

**Fig. 1S** Effects of desipramine and cimetidine on platinum drug cytotoxicity

in HCT116 cells. Sub-diploid cell content was detected by PI-DNA staining. Pt-drugs concentrations were adjusted to achieve approximately 20-30% apoptosis after 48h, allowing ready measurement of enhancement or inhibition. Drugs were added to the media after 1h of treatment with inhibitor. In A, B, C, HCT116 cells were cultured with 50μmol/L BBR3464, 10μmol/L c-DDP, or 30μmol/L oxaliplatin

respectively for 72h in the absence and presence of 40 $\mu$ mol/L desipramine. In D,E,F, HCT116 cells were cultured with 50 $\mu$ mol/L BBR3464, 10 $\mu$ mol/L c-DDP or 30 $\mu$ mol/L Oxaliplatin for 72h in the absence or presence of 0.75 mmol/L of cimetidine. Each point represents the average (+/- SEM) of three independent experiments. \*, p<0.05 when comparing cells treated with and without desipramine or cimetidine, by Student's t-test
